# Supplementary material
Source: Springer Nature journal article supplement (https://www.springermedizin.de/resource/supplementary/12998_2009_105_MOESM8_ESM.pdf/9623626)
Supplement: MOESM8 [file 9623626]

| Non-Musculoskeletal Conditions | Intervention                               | Evidence      |          |      |
|--------------------------------|--------------------------------------------|---------------|----------|------|
|                                |                                            | Inconclusive  | Moderate | High |
| Asthma                         | Spinal manipulation                        |               | negative |      |
| Asthma                         | Foot reflexology                           | non-favorable |          |      |
| Pneumonia in Older Adults      | Osteopathic manipulative therapy           | favorable     |          |      |
| Cervicogenic dizziness         | Mobilization                               |               | positive |      |
| Stage 1 Hypertension           | Spinal manipulation added to diet          |               | negative |      |
| Hypertension                   | Instrument assisted spinal manipulation    | unclear       |          |      |
| Stage 1 Hypertension           | Upper Cervical (NUCCA) Spinal manipulation | favorable     |          |      |
| Dysmenorrhea                   | Spinal manipulation                        |               | negative |      |
| Premenstrual syndrome          | Spinal manipulation                        | unclear       |          |      |
| Premenstrual syndrome          | Massage                                    | favorable     |          |      |
| Premenstrual syndrome          | Reflexology                                | favorable     |          |      |
